# Supplementary material for: Trash to treasure: recycling discarded agarose gel for practical Na/K-ion batteries
Source: Royal Society of Chemistry journal article supplement (doi:10.1039/d2ta02007f), 2022-01-01
Supplement: d2ta02007f1.pdf [file d2ta02007f1.pdf]

## Supporting Information for

### Trash to treasure: recycling discarded agarose gel for practical Na/K-ion batteries

Deping Li<sup>1,\*,#</sup>, Fengjun Ji<sup>1,#</sup>, Tianqi Liu<sup>1,#</sup>, Xiaoyu Zhao<sup>2</sup>, Qing Sun<sup>3</sup>, Yunzhuo Liu<sup>1</sup>, Yiwei Wang<sup>1</sup>,  
Jiaheng Zhang<sup>1</sup>, Lijie Ci<sup>1,3,\*</sup>

<sup>1</sup>State Key Laboratory of Advanced Welding and Joining, School of Materials Science and Engineering, Harbin Institute of Technology (Shenzhen), Shenzhen 518055, China

<sup>2</sup>CAS Key Laboratory of Quantitative Engineering Biology, Shenzhen Institute of Synthetic Biology, Shenzhen Institutes of Advanced Technology, Chinese Academy of Sciences, Shenzhen 518055, China

<sup>3</sup>Research Center for Carbon Nanomaterials, Key Laboratory for Liquid-Solid Structural Evolution & Processing of Materials (Ministry of Education), School of Materials Science and Engineering, Shandong University, Jinan, 250061, China

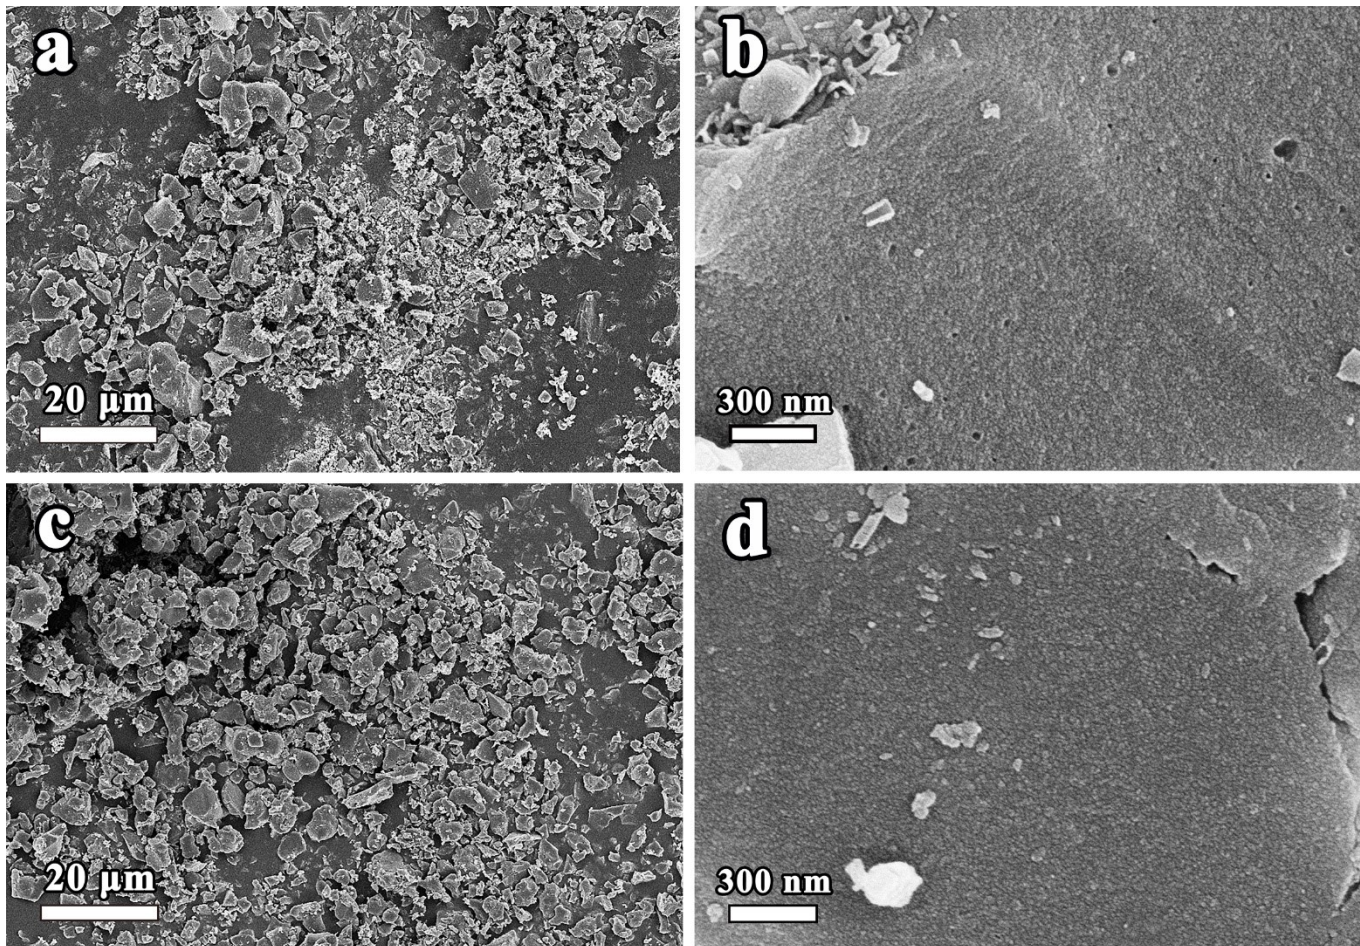

Figure S1 SEM images of (a-b) AGC and (c-d) AGC-N.

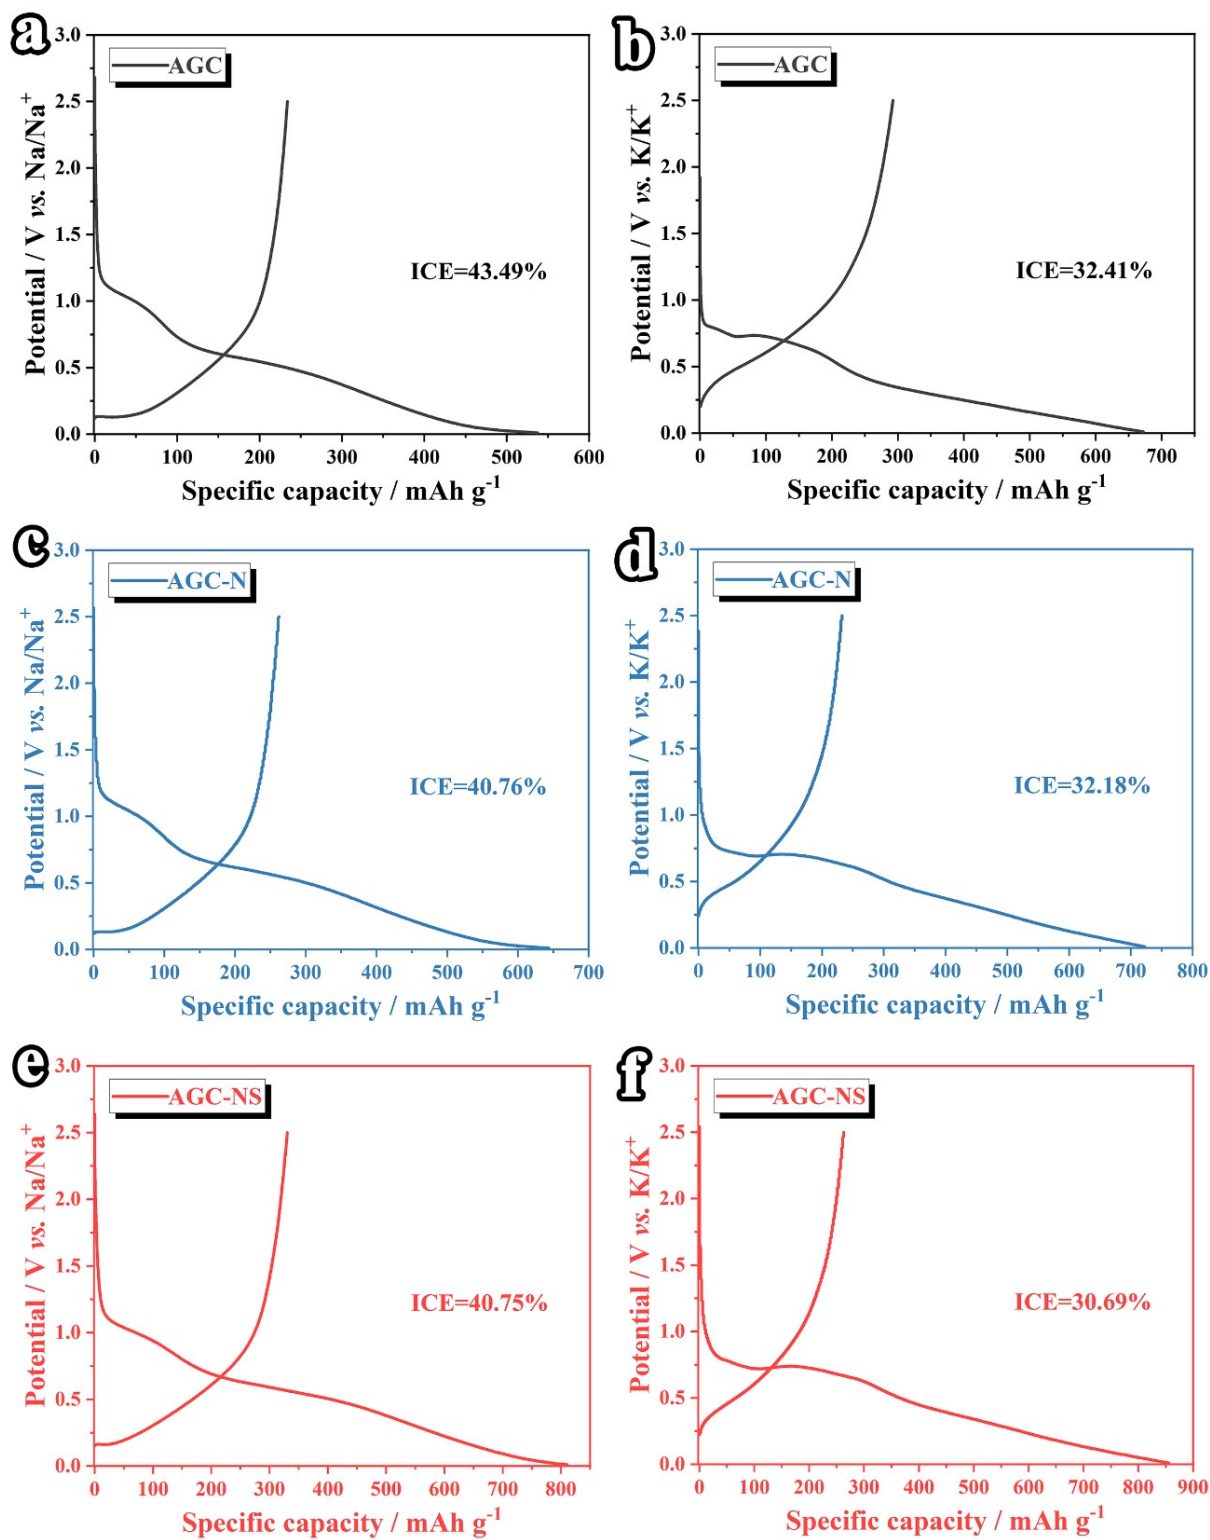

**Figure S2** Galvanostatic charge-discharge profiles in SIBs (a) AGC, (c) AGC-N, (e) AGC-NS.

Galvanostatic charge-discharge profiles in PIBs (b) AGC, (d) AGC-N, (f) AGC-NS.

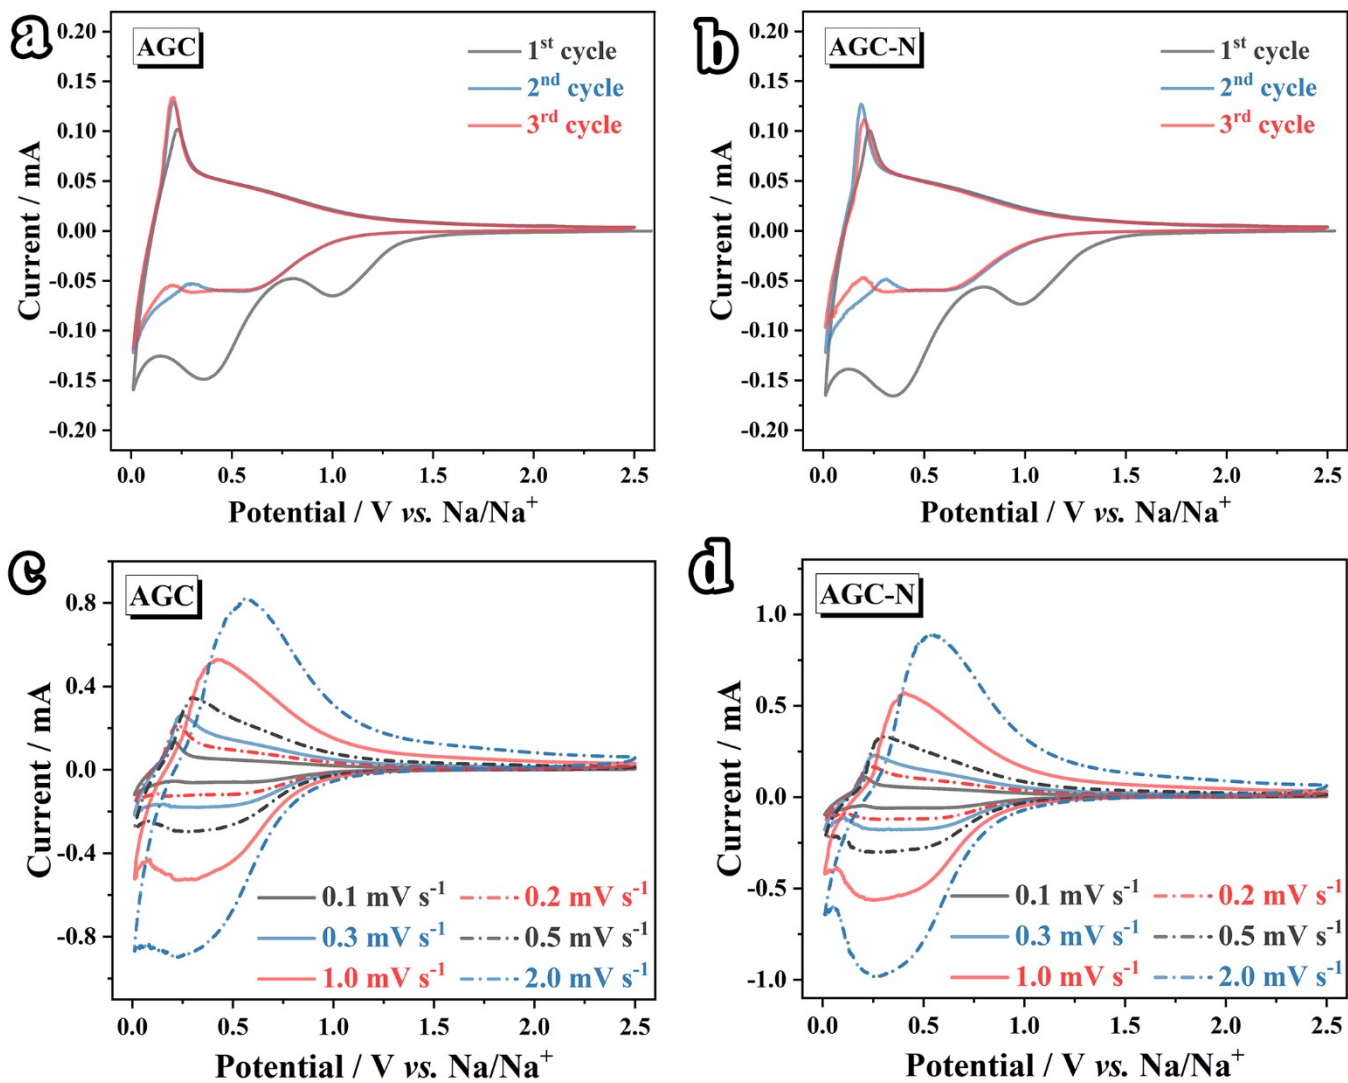

**Figure S3** Cyclic voltammetry profiles of (a) AGC and (b) AGC-N at 0.1 mV s<sup>-1</sup>, Cyclic voltammetry profiles of (c) AGC and (d) AGC-N at various scan rates from 0.1 mV s<sup>-1</sup> to 2.0 mV s<sup>-1</sup> in SIBs.

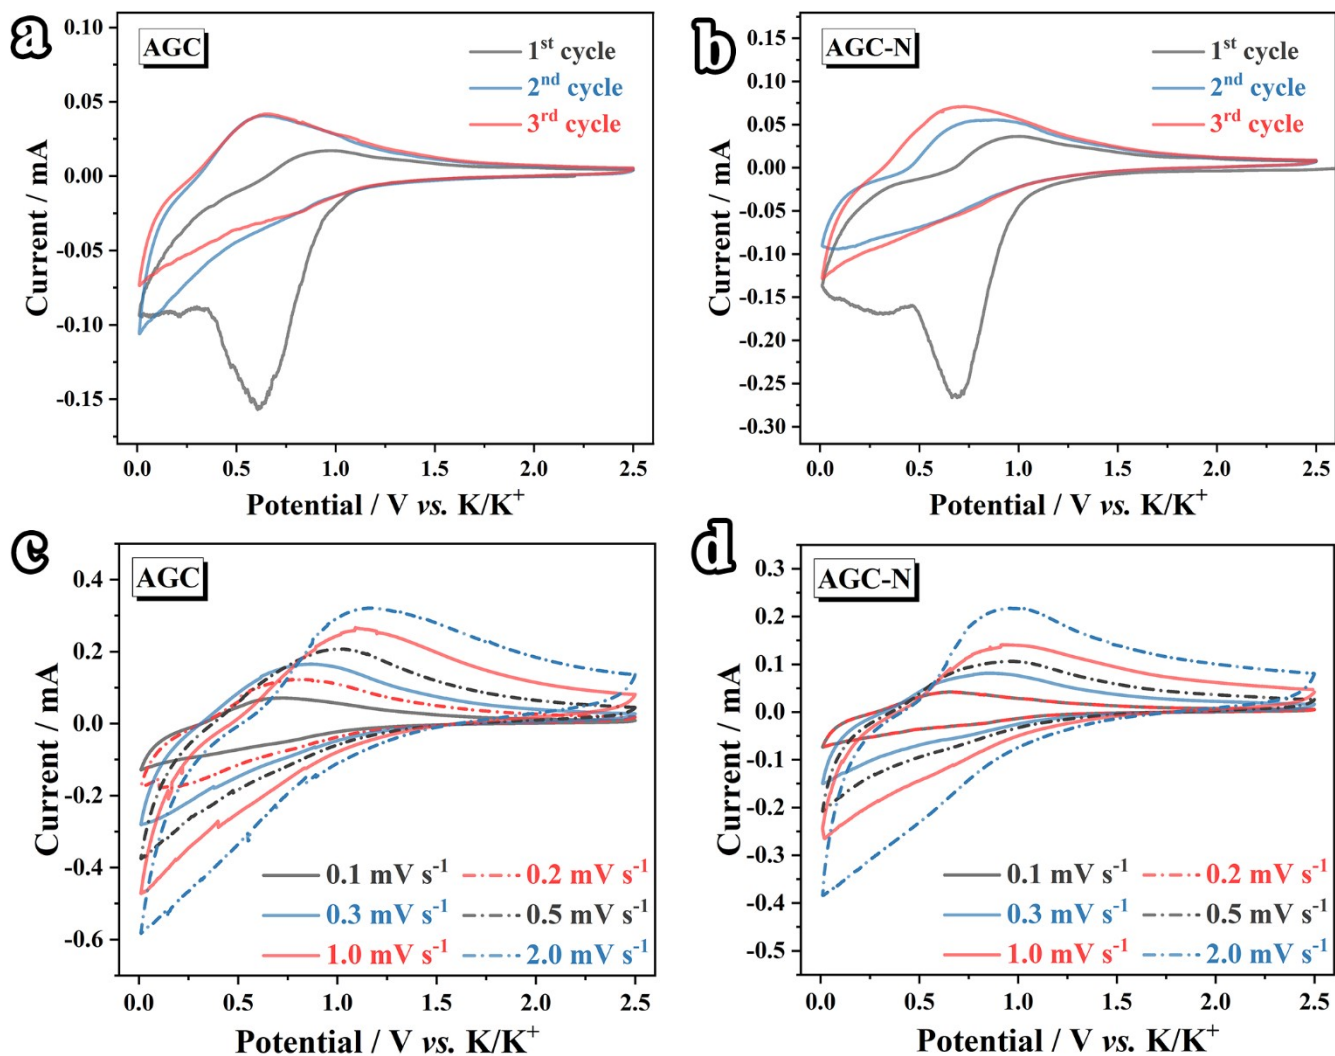

**Figure S4** Cyclic voltammetry profiles of (a) AGC and (b) AGC-N at 0.1 mV s<sup>-1</sup>, Cyclic voltammetry profiles of (c) AGC and (d) AGC-N at various scan rates from 0.1 mV s<sup>-1</sup> to 2.0 mV s<sup>-1</sup> in PIBs.

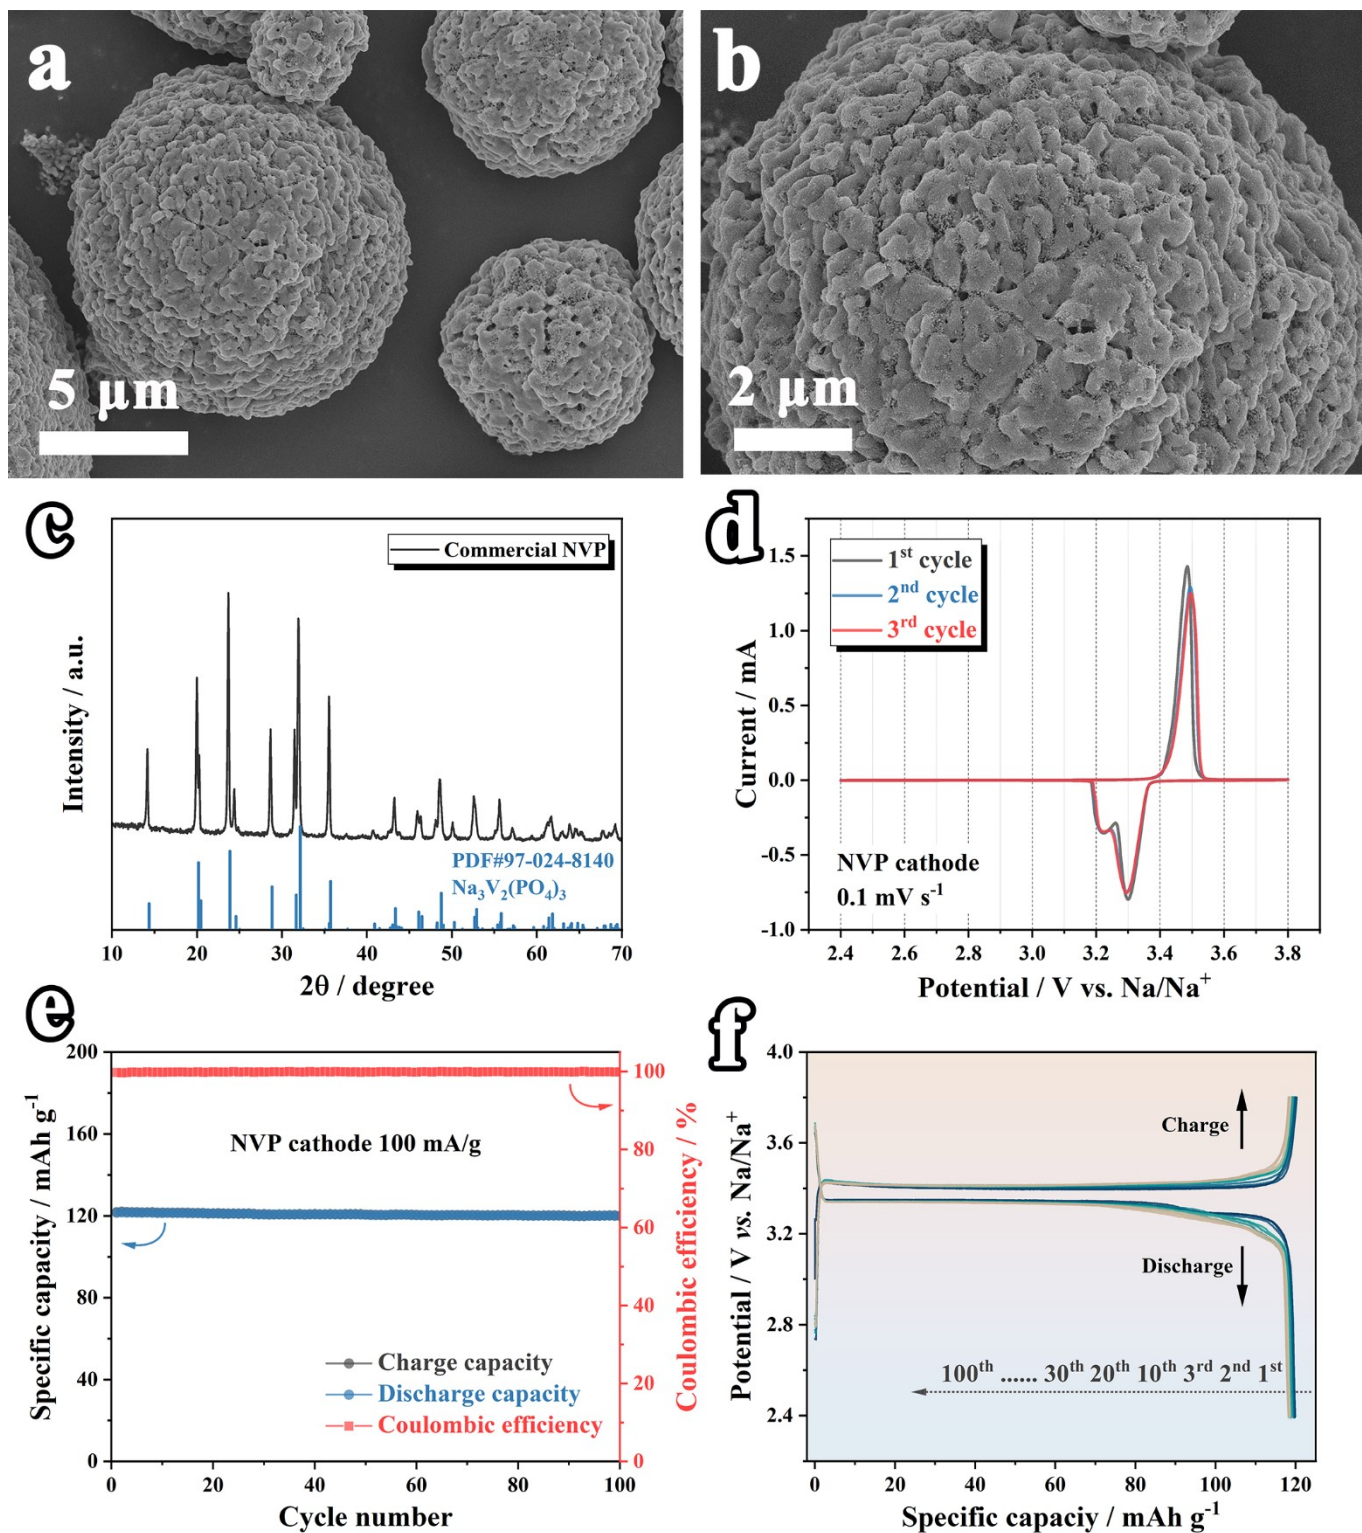

**Figure S5** Electrochemical performance of NVP cathode in SIBs. (a-b) SEM images, (c) XRD pattern, (d) CV profile, (e) cycling stability at 100 mA/g, and (f) GCD profiles at 100 mA/g.

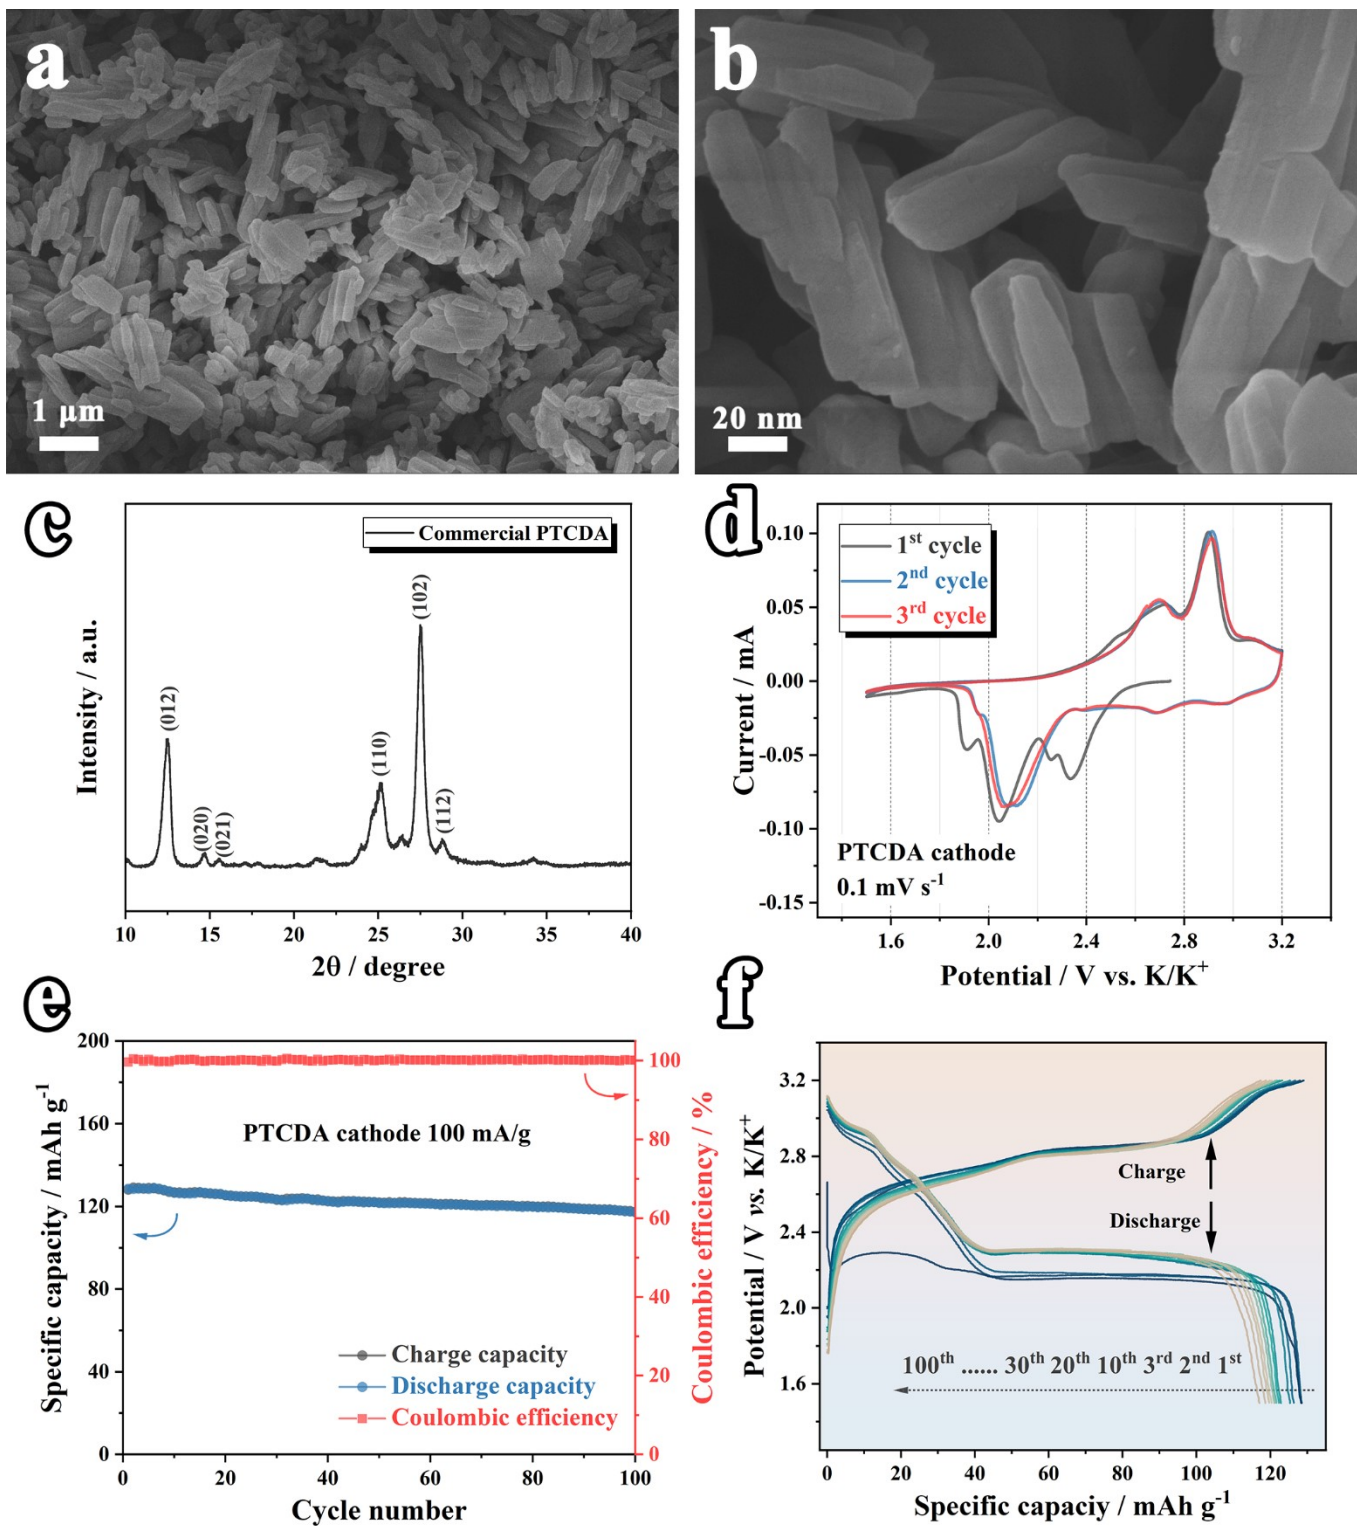

**Figure S6** Electrochemical performance of PTCDA cathode in PIBs. (a-b) SEM images, (c) XRD pattern, (d) CV profile, (e) cycling stability at 100 mA/g, and (f) GCD profiles at 100 mA/g.

**Table S1** A comparison of recently reported hard carbon anodes employed in both SIBs and PIBs.

| Name                   | Reversible capacity<br>(mAh g <sup>-1</sup> @A g <sup>-1</sup> ) |                         | Rate Capacity<br>(mAh g <sup>-1</sup> @A g <sup>-1</sup> ) |                    | ICE    |        | Cycle life<br>(Cycle number @A g <sup>-1</sup> ) |          |
|------------------------|------------------------------------------------------------------|-------------------------|------------------------------------------------------------|--------------------|--------|--------|--------------------------------------------------|----------|
|                        | SIBs                                                             | PIBs                    | SIBs                                                       | PIBs               | SIBs   | PIBs   | SIBs                                             | PIBs     |
| This work<br>AGC-NS    | 314.8@0.1                                                        | 283.7@0.1               | 181.0@1.0<br>148.7@2.0                                     | 147.0@1.0          | 40.75% | 30.69% | 2000@1.0                                         | 1000@1.0 |
| 3D-ENTC <sup>1</sup>   | 435@0.05<br>364@0.1                                              | 420@0.05<br>399@0.1     | 195@5                                                      | 93@5               | 61.6%  | 48.7%  | 500@1.0                                          | 700@1.0  |
| HC-MX <sup>2</sup>     | 368.5@0.03                                                       | 280.6@0.03              | 98.2@2<br>66.7@10                                          | 210@0.05           | /      | /      | 300@0.05                                         | 100@0.05 |
| NPHC <sup>3</sup>      | 281@0.025                                                        | 339@0.025               | 52@3.0                                                     | 98@2.0             | /      | /      | 120@0.1                                          | 200@0.1  |
| HCG <sup>4</sup>       | 343.1@0.025<br>148@0.25                                          | 292.4@0.025<br>190@0.25 | 106@1.0                                                    | 102@2.0            | 80.1%  | 76.4%  | 200@0.1                                          | 200@0.1  |
| FAC <sup>5</sup>       | 179.5@0.05<br>142.4@0.1                                          | 276.7@0.05<br>142.4@0.1 | 95@0.8                                                     | 121.2@0.8          | 53.2%  | 63.4%  | 2000@0.4                                         | 1000@0.4 |
| CS <sup>6</sup>        | 252@0.05<br>236@0.1                                              | 331@0.05<br>298@0.1     | 104@2.0                                                    | 153@2.0            | /      | /      | /                                                | 500@2.0  |
| CSHP <sup>7</sup>      | 210.2@0.1                                                        | 264.5@0.1               | 145@0.5<br>123@1.0                                         | 164@0.5<br>143@0.8 | 44.1%  | 45.1%  | 100@0.1                                          | 100@0.1  |
| VCA <sup>8</sup>       | 298@0.03                                                         | 258@0.0279              | 209@0.3                                                    | 148@2.0            | /      | /      | 100@2.0                                          | 100@2.0  |
| Co-HMT <sup>9</sup>    | 293@0.1<br>225@0.5                                               | 326@0.1<br>232@0.5      | 131@10                                                     | 105@10             | 45%    | 35%    | 5000@2.0                                         | 5000@2.0 |
| Fe-N/C <sup>10</sup>   | 289.2@0.1<br>266.7@0.2                                           | 328.1@0.1<br>274.7      | 214.7@1.0<br>190.8@2.0                                     | 176.6@1<br>152.5@2 | 44.7%  | 47.6%  | 1000@0.5                                         | 1000@0.5 |
| CNT/SNCF <sup>11</sup> | 370.8@0.2                                                        | /                       | 249.5@1.0<br>200.5@2.0                                     | 230.1@1<br>190.6@2 | 49.1%  | 41.6%  | 1000@1.0                                         | 5000@5.0 |
| NPDCs <sup>12</sup>    | 369@0.5                                                          | 360@0.5                 | 183@3.0<br>150@5.0                                         | 216@3<br>179@5     | 40.5%  | 44%    | 2000@2.0                                         | 2000@2.0 |
| HNC-550 <sup>13</sup>  | 474@0.05                                                         | 510.2@0.05              | 205.1@1.0<br>135.2@5.0                                     | 143.9@1<br>93@5    | 76.5%  | 75.6%  | 2000@10                                          | 1000@5.0 |
| NS-HCS <sup>14</sup>   | 279.4@0.05                                                       | 232.3@0.1               | 142.6@1<br>94.9@5                                          | 114.8@1<br>41.6@5  | 29.4%  | /      | 500@0.1                                          | 700@1.0  |



## References

1. Zhang, W.; Sun, M.; Yin, J.; Wang, W.; Huang, G.; Qiu, X.; Schwingenschlögl, U.; Alshareef, H. N., Rational design of carbon anodes by catalytic pyrolysis of graphitic carbon nitride for efficient storage of Na and K mobile ions. *Nano Energy* **2021**, *87*, 106184.
2. Sun, N.; Zhu, Q.; Anasori, B.; Zhang, P.; Liu, H.; Gogotsi, Y.; Xu, B., MXene-bonded flexible hard carbon film as anode for stable Na/K-ion storage. *Advanced Functional Materials* **2019**, *29* (51), 1906282.
3. Wen, X.; Zhang, D.; Shi, L.; Yan, T.; Wang, H.; Zhang, J., Three-dimensional hierarchical porous carbon with a bimodal pore arrangement for capacitive deionization. *Journal of Materials Chemistry* **2012**, *22* (45), 23835-23844.
4. Yan, L.; Wang, J.; Ren, Q.; Fan, L.; Liu, B.; Zhang, L.; He, L.; Mei, X.; Shi, Z., In-situ graphene-coated carbon microsphere as high initial coulombic efficiency anode for superior Na/K-ion full cell. *Chemical Engineering Journal* **2022**, *432*, 133257.
5. Yin, J.; Zhang, W.; Huang, G.; Alhebshi, N. A.; Salah, N.; Hedhili, M. N.; Alshareef, H. N., Fly Ash Carbon Anodes for Alkali Metal-Ion Batteries. *ACS Applied Materials & Interfaces* **2021**, *13* (22), 26421-26430.
6. Wang, D.; Du, G.; Han, D.; Su, Q.; Ding, S.; Zhang, M.; Zhao, W.; Xu, B., Porous flexible nitrogen-rich carbon membranes derived from chitosan as free-standing anodes for potassium-ion and sodium-ion batteries. *Carbon* **2021**, *181*, 1-8.
7. Chen, S.; Tang, K.; Song, F.; Liu, Z.; Zhang, N.; Lan, S.; Xie, X.; Wu, Z., Porous hard carbon spheres derived from biomass for high-performance sodium/potassium-ion batteries. *Nanotechnology* **2021**, *33* (5), 055401.
8. Wang, J.; Xu, Z.; Eloi, J. C.; Titirici, M. M.; Eichhorn, S. J., Ice-Templated, Sustainable Carbon Aerogels with Hierarchically Tailored Channels for Sodium-and Potassium-Ion Batteries. *Advanced Functional Materials* **2022**, *32*(16), 2110862.
9. Liu, S.; Yang, B.; Zhou, J.; Song, H., Nitrogen-rich carbon-onion-constructed nanosheets: an ultrafast and ultrastable dual anode material for sodium and potassium storage. *Journal of Materials Chemistry A* **2019**, *7* (31), 18499-18509.
10. Liu, Y.; Li, X.; Zhang, F.; Long, G.; Fan, S.; Zheng, Y.; Ye, W.; Li, Q.; Wang, X.; Li, H., Fe, N co-doped amorphous carbon as efficient electrode materials for fast and stable Na/K-storage. *Electrochimica Acta* **2021**, *396*, 139265.
11. Chen, D.; Huang, Z.; Sun, S.; Zhang, H.; Wang, W.; Yu, G.; Chen, J., A Flexible Multi-Channel Hollow CNT/Carbon Nanofiber Composites with S/N Co-Doping for Sodium/Potassium Ion Energy Storage. *ACS Applied Materials & Interfaces* **2021**, *13* (37), 44369-44378.
12. Tao, S.; Xu, W.; Zheng, J.; Kong, F.; Cui, P.; Wu, D.; Qian, B.; Chen, S.; Song, L., Soybean roots-derived N, P Co-doped mesoporous hard carbon for boosting sodium and potassium-ion batteries. *Carbon* **2021**, *178*, 233-242.
13. Huang, R.; Cao, Y.; Qin, S.; Ren, Y. X.; Lan, R.; Zhang, L.; Yu, Z.; Yang, H., Ultra-high N-doped Open Hollow Carbon Nano-cage with Excellent Na<sup>+</sup> and K<sup>+</sup> Storage Performances. *Materials Today Nano* **2022**, 100217, DOI: <https://doi.org/10.1016/j.mtnano.2022.100217>.
14. Sun, D.; Lin, S.; Yu, D.; Wang, Z.; Deng, F.; Zhou, X.; Ma, G.; Lei, Z., Interlayer and doping engineering in partially graphitic hollow carbon nanospheres for fast sodium and potassium storage. *Chinese Chemical Letters* **2022**, DOI: <https://doi.org/10.1016/j.ccl.2022.03.062>.
